# Supplementary material for: Complanine, an inflammation-inducing substance isolated from the marine fireworm Eurythoe complanata
Source: Royal Society of Chemistry journal article supplement (doi:10.1039/b803107j), 2008-01-01

*Supplemental Material for*

Complanine, an inflammation-inducing substance isolated from the marine fireworm

*Eurythoe complanata*

Kazuhiko Nakamura,\* Yu Tachikawa, Makoto Kitamura, Osamu Ohno, Masami  
Suganuma and Daisuke Uemura\*

The  $^1\text{H}$  and  $^{13}\text{C}$  NMR data of complanine.

NMR spectra were recorded on a JEOL JNM-ECA600 (600 MHz for  $^1\text{H}$  and 150 MHz for  $^{13}\text{C}$ ).

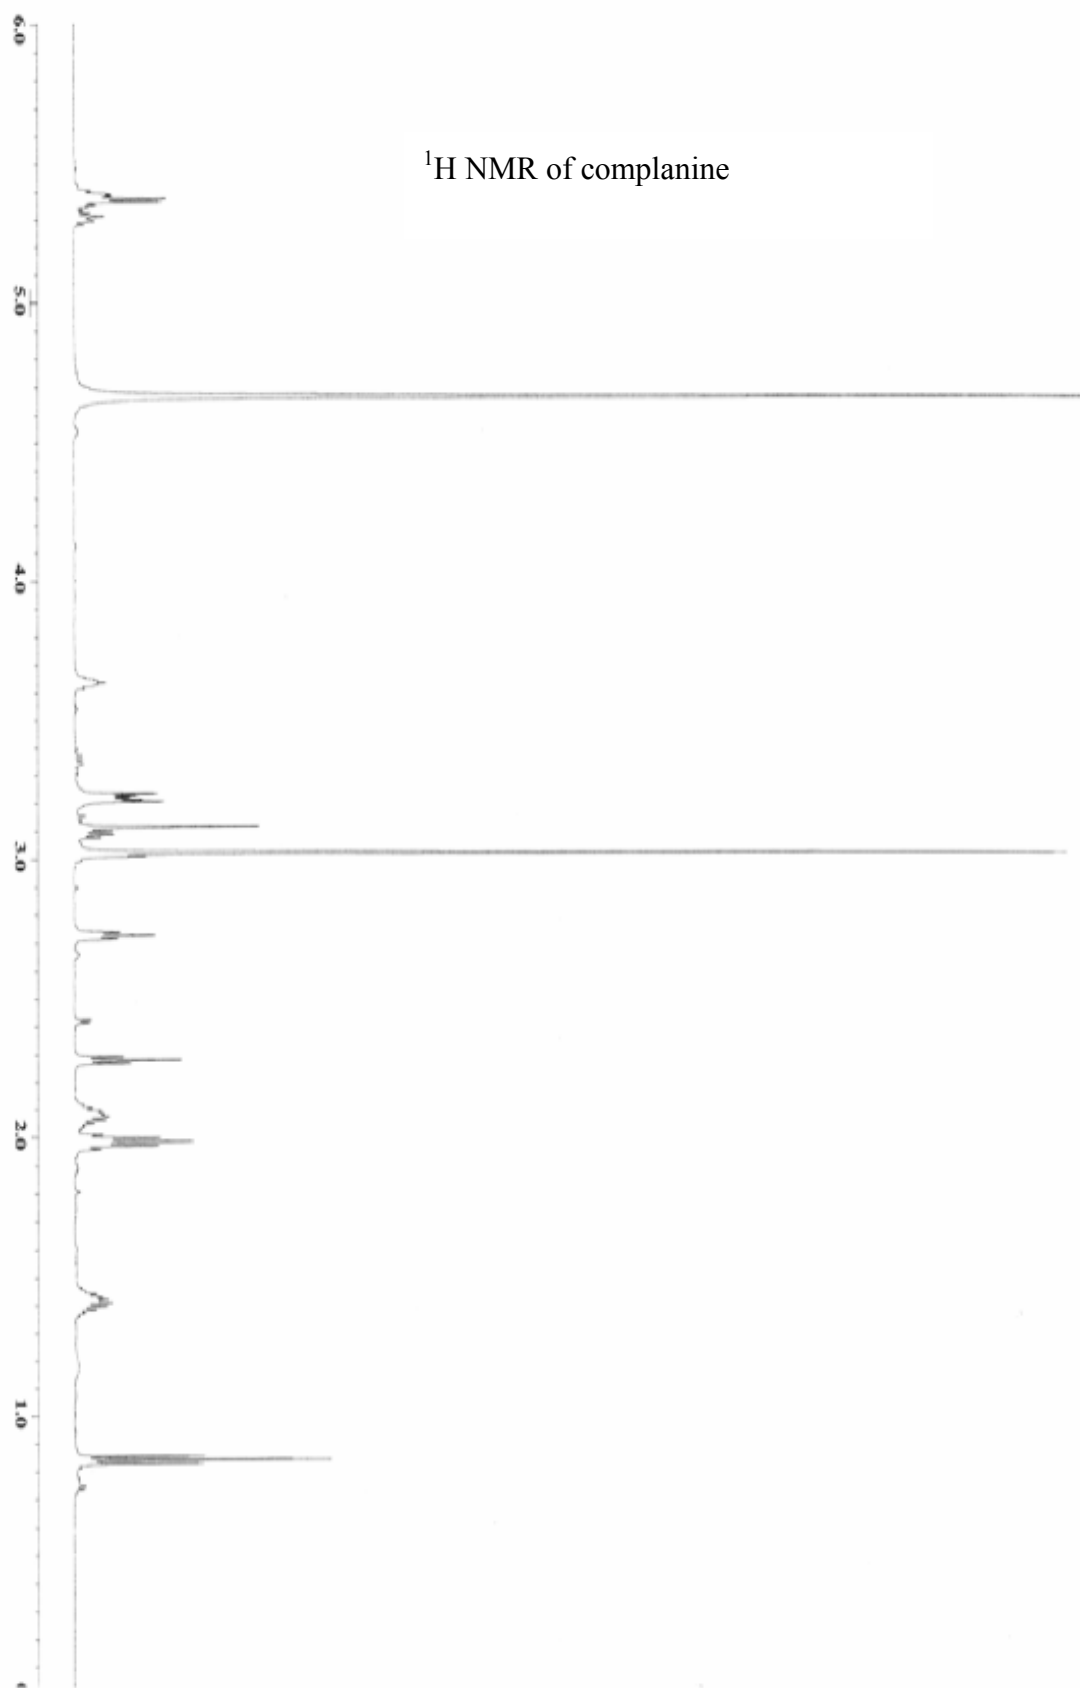

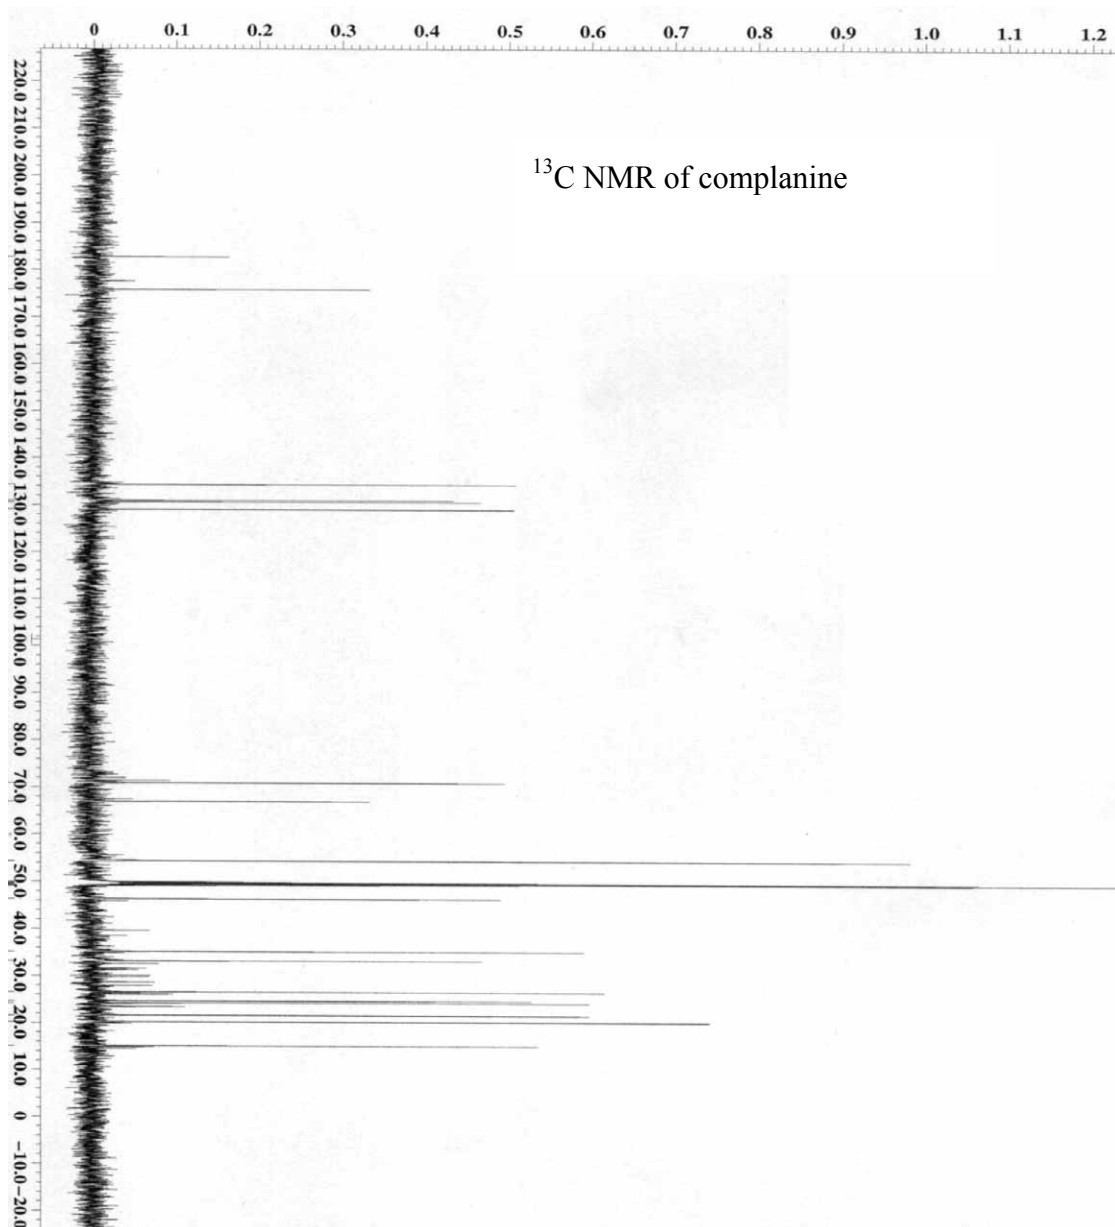

Supplement: b803107j.pdf [file b803107j.pdf]
